# Supplementary material
Source: PubMed Central journal article supplement (PMC3965899)
Supplement: supp_113.055178_supplemental_data_55178.pdf [file supp_113.055178_supplemental_data_55178.pdf]

## **Drug Metabolism and Disposition**

**DMD/2013/055178**

**17 $\beta$ -Estradiol (E2) induces sulfotransferase (SULT) 2A1 expression through estrogen receptor (ER)  $\alpha$**

Wei Li, Miaoran Ning, Kwihye Koh, Heesue Kim, and Hyunyoung Jeong

**Supplemental Table 1. Sequences of oligonucleotides used in this study**

| <b>Cloning primers</b>      |                                                                                                                                            |
|-----------------------------|--------------------------------------------------------------------------------------------------------------------------------------------|
| pGL3-SULT2A1<br>(-826/+140) | (F) CCGGGGTACCCTGCCAATTCCTTTGTGAAAATCCAA<br>(R) ATTGCTCGAGGATGATGACCTCTTCCTGCGTGGTG                                                        |
| pGL3-SULT2A1<br>(-566/+140) | (F) CCGGGGTACCCTGACTTACTCTTTTTTCTCTAGA<br>(R) ATTGCTCGAGGATGATGACCTCTTCCTGCGTGGTG                                                          |
| pGL3-SULT2A1<br>(-257/+140) | (F) CCGGGGTACCGATTTTGTGTTTATGCTTGATGA<br>(R) ATTGCTCGAGGATGATGACCTCTTCCTGCGTGGTG                                                           |
| pGL3-SULT2A1<br>(-89/+140)  | (F) CCGGGGTACCGTCTCTAGATAACTTCATGATTGC<br>(R) ATTGCTCGAGGATGATGACCTCTTCCTGCGTGGTG                                                          |
| pGL3-SULT2A1<br>(+47/+140)  | (F) CCGGGGTACCCCTTGCTGTAAAAGCTGATCTG<br>(R) ATTGCTCGAGGATGATGACCTCTTCCTGCGTGGTG                                                            |
| pGL3-SULT2A1 mutation S1    | (F) CAGTTCACCTCTCAGGAACGCAACCTCAGATTACCCCTAAAATG<br>(R) CATTTTAGGGGTAATCTGAGGTTGCGTTCCTGAGAGTGAAGTG                                        |
| pGL3-SULT2A1 mutation S2    | (F) TCATGATTGCTCAACATCTTCAATCTTTTGTAGTATCGTCTACATTATACCTCTCTTTATCAGC<br>(R) GCTGATAAAGAGAGGTATAATGTAGACGATACTCAAAGATTGAAGATGTTGAGCAATCATGA |
| pGL3-SULT2A1 mutation S3    | (F) ACACCACGCAGGAAGAGGTATTCATCCTCGAGATCTG<br>(R) CAGATCTCGAGGATGAATACCTCTTCCTGCGTGGTGT                                                     |
| <b>qRT-PCR</b>              |                                                                                                                                            |
| Human GAPDH                 | (F) CCACATCGCTCAGACACCAT<br>(R) AAATCCGTTGACTCCGACCTT<br>(Taqman) Universal ProbeLibrary Probe #60 (Roche)                                 |
| <b>ChIP assay</b>           |                                                                                                                                            |
| SULT2A1                     | (F) TTCACTCTCAGGAACGCAAG<br>(R) GAGGTATAATGTGACCCATACTCAA                                                                                  |
| TFF1                        | (F) GACGGAATGGGCTTCATGA<br>(R) AGTGAGAGATGGCCGAAAA                                                                                         |
| <b>EMSA DNA probes</b>      |                                                                                                                                            |
| S1                          | CGCAAGCTCAGATGACCCCTAAA                                                                                                                    |
| mS1                         | CGCAAGCGGGGACGCGTCCCTAAA                                                                                                                   |
| S2                          | TGAGTATGGGTCACATTATACCTCT                                                                                                                  |
| mS2                         | TGAGTATCGTCTACATTATACCTCT                                                                                                                  |
| S3                          | GCAGGAAGAGGTCATCATC                                                                                                                        |
| mS3                         | GCAGGAAGAGTCCCACATC                                                                                                                        |

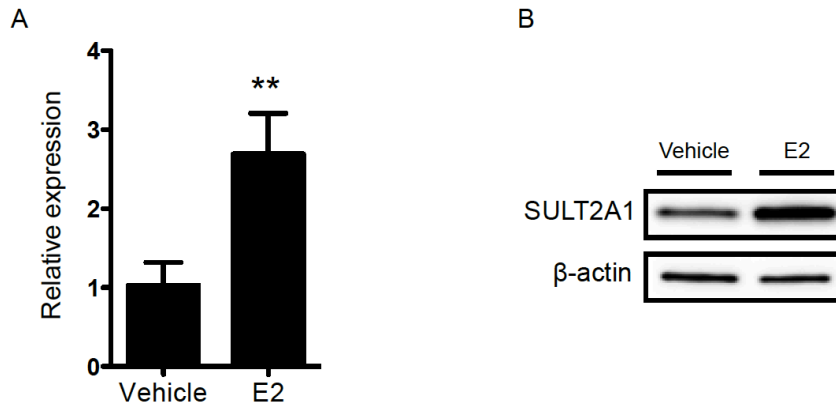

**Fig. S1. E2 induce SUTL2A1 expression in HepG2-ER cells.** (A) HepG2-ER cells were treated with vehicle (ethanol) or E2 (100 nM) for 24 h. mRNA expression level of SULT2A1 was determined by qRT-PCR. \*\*  $p < 0.01$  vs. vehicle group. (B) HepG2-ER cells were treated with vehicle (ethanol) or E2 (100 nM) for 72 h. Protein expression level of SULT2A1 was determined by western blot.
